# Supplementary material
Source: PubMed Central journal article supplement (PMC4468540)
Supplement: IAI.02922-14_zii999091282so1.pdf [file IAI.02922-14_zii999091282so1.pdf]

**Figure S1**

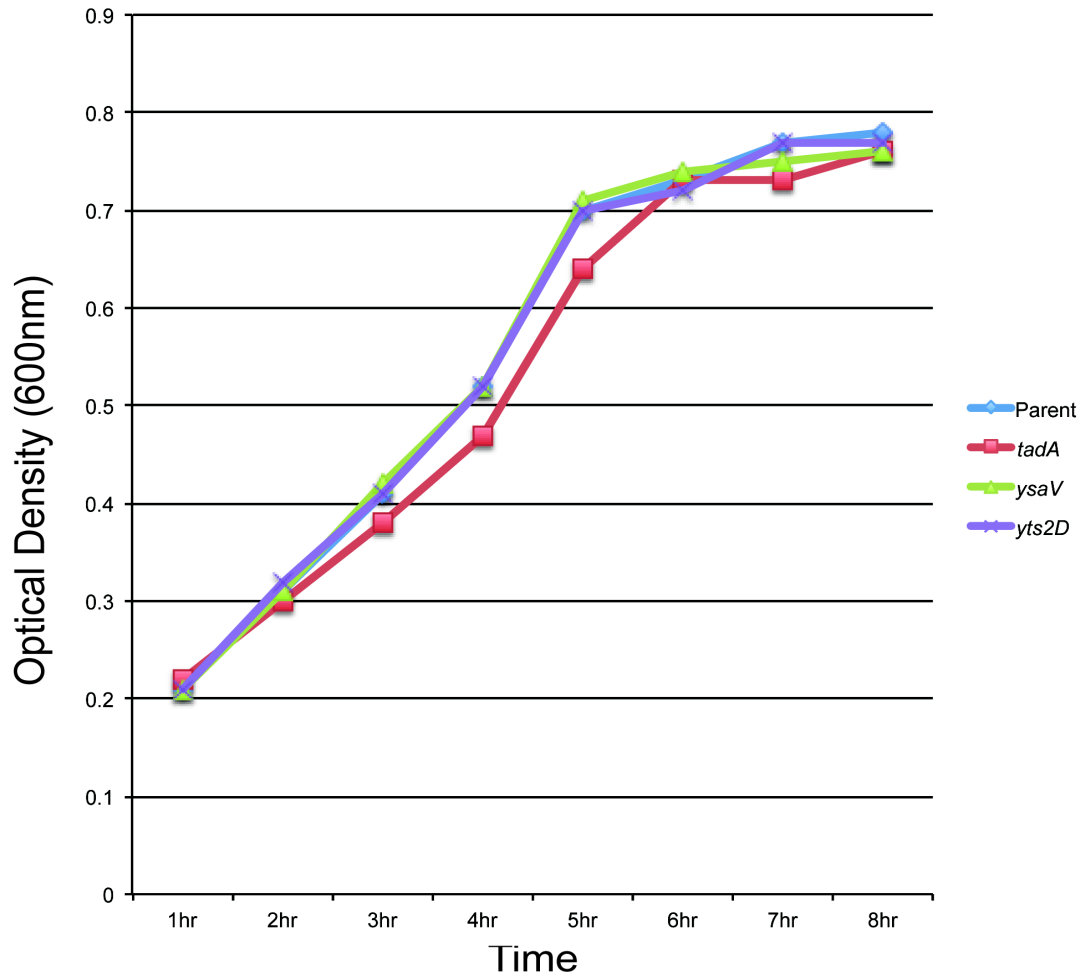

**Figure S1: Growth of mutants in RPMI**

The parent strain and derived mutants were grown for 8 hours in RPMI at 37°C. Note that all have approximately equal growth rates and grow to the same density.

## **Supplemental Table Legend**

**Table S1: Strains and plasmids used in this study**

**Table S2: DESeq2 results comparing bacteria in conditioned RPMI to bacteria in growth medium 120 minutes post-infection**

**Table S3: DESeq2 results comparing extracellular bacteria to bacteria in conditioned RPMI 120 minutes post-infection**

**Table S4: Identity and predicted function of genes that have changing expression levels during extracellular infection**

**Table S5: DESeq2 results comparing intracellular to extracellular bacteria 120 minutes post-infection**

**Table S6: FPKM and DESeq2 analysis of the pYV plasmid after 120 minutes of infection in each environment**

**Table S7: FPKM and DESeq2 analysis of the Ysa locus and the secreted effects of the Ysa T3SS after 120 minutes of infection in each environment**

**Table S8: FPKM and DESeq2 analysis of the Yts1 and Yts2 loci and the secreted effects of the Yts1 T2SS after 120 minutes of infection in each environment**

**Table S9: All FPKM values and DESeq2 results for *Y. enterocolitica* genes in all environments at four time points**
